# Supplementary material for: Cadmium tolerance and accumulation characteristics of wetland emergent plants under hydroponic conditions
Source: Royal Society of Chemistry journal article supplement (doi:10.1039/c8ra04015j), 2018-01-01
Supplement: c8ra04015j1.pdf [file c8ra04015j1.pdf]

## Supplementary Information:

### **Cadmium Tolerance and Accumulation Characteristics of Wetland Emergent Plants under Hydroponic Conditions**

Yangyang Wang<sup>a,b,#</sup>, Ningqing Lv<sup>b,#</sup>, Xuhui Mao<sup>c</sup>, Zheng Yan<sup>d</sup>, Jinsheng  
Wang<sup>b,e</sup>, Wenbing Tan<sup>b</sup>, Tongtong Li<sup>b</sup>, Hui Liu<sup>b</sup>, Lei Wang<sup>\*,a,b</sup>, Beidou  
Xi<sup>\*,a,b</sup>

<sup>a</sup> Key Laboratory of Clean Energy of Liaoning, College of Energy and Environment,  
Shenyang Aerospace University, Shenyang 110136, China

<sup>b</sup> State Environmental Protection Key Laboratory of Simulation and Control of  
Groundwater Pollution, Chinese Research Academy of Environmental Sciences,  
Beijing 100012, P. R. China

<sup>c</sup> School of Resources and Environmental Science, Wuhan University, Hubei, Wuhan  
430070, P. R. China

<sup>d</sup> Chinese Society For Environmental Sciences, Beijing 100012, P. R. China

<sup>e</sup> Shenzhen Long Cheng High-tech Environmental protection Co., Ltd., Shenzhen  
Guangdong 518063

\* Corresponding author

Dr. Lei Wang

E-mail addresses: wanglei01@craes.org.cn (Wang, L.); xibeidou@yeah.net (Xi, B.D.)

**Table. S1.** Concentrations of Cd in the roots, stems, and leaves of wetland emergent plants under Cd treatments.

| Treatment mg/L                  | Root  |             | Stem |           | Leaf |          |   |
|---------------------------------|-------|-------------|------|-----------|------|----------|---|
| <i>Iris sibirica</i> L.         | ck    | 2.8±0.7     | a    | 1.5±0.5   | a    | 1.5±0.2  | a |
|                                 | 5.00  | 91.7±4.6    | b    | 34.4±2.5  | b    | 7.7±1.0  | b |
|                                 | 10.00 | 259.2±7.6   | c    | 54.9±4.1  | c    | 31.2±3.5 | c |
|                                 | 15.00 | 373.1±5.1   | d    | 172.0±3.9 | d    | 17.7±3.2 | d |
|                                 | 25.00 | 463.8±9.5   | e    | 258.4±4.9 | e    | 56.9±3.4 | e |
| <i>Cyperus alternifolius</i> L. | ck    | 6.9±1.3     | a    | 5.6±0.9   | a    | 4.1±1.1  | a |
|                                 | 5.00  | 542.5±8.7   | b    | 43.0±4.3  | b    | 17.5±3.5 | b |
|                                 | 10.00 | 757.0±8.5   | c    | 57.8±3.2  | c    | 36.9±5.0 | c |
|                                 | 15.00 | 804.0±4.9   | d    | 88.3±4.6  | d    | 57.3±4.1 | d |
|                                 | 25.00 | 915.0±4.2   | e    | 92.3±3.7  | e    | 65.8±2.0 | e |
| <i>Typha orientalis</i> Presl   | ck    | 3.7±0.4     | a    | 2.16±0.1  | a    | 4.9±0.3  | a |
|                                 | 5.00  | 264.8±6.5   | b    | 25.0±2.8  | b    | 2.9±0.2  | a |
|                                 | 10.00 | 635.5±3.7   | c    | 138.3±2.5 | c    | 15.9±1.7 | b |
|                                 | 15.00 | 511.5±2.7   | d    | 70.1±2.7  | d    | 2.4±0.2  | a |
|                                 | 25.00 | 1227.0±22.1 | e    | 213.7±8.4 | e    | 27.3±2.7 | c |
| <i>Acorus calamus</i> L.        | ck    | 6.6±0.4     | a    | 3±0.3     | a    | 1.5±0.2  | a |
|                                 | 5.00  | 57.0±3.3    | b    | 13.0±0.5  | b    | 5.8±0.3  | b |
|                                 | 10.00 | 364.3±4.4   | c    | 26.8±1.5  | c    | 12.3±1.2 | c |
|                                 | 15.00 | 412.5±1.6   | d    | 25.5±1.7  | c    | 12.2±1.2 | c |
|                                 | 25.00 | 360.9±5.4   | c    | 43.3±2.6  | d    | 14.1±0.8 | c |

Data are means ± S.D. (n = 3). One-way ANOVA (1 factor: different Cd treatments) were performed for each parameter. Means with different letters are significantly different from each other (P < 0.05) according to the LSD test.
